# Supplementary material
Source: Springer Nature journal article supplement (https://www.springermedizin.de/resource/supplementary/13075_2012_3603_MOESM16_ESM.pdf/9694898)

A

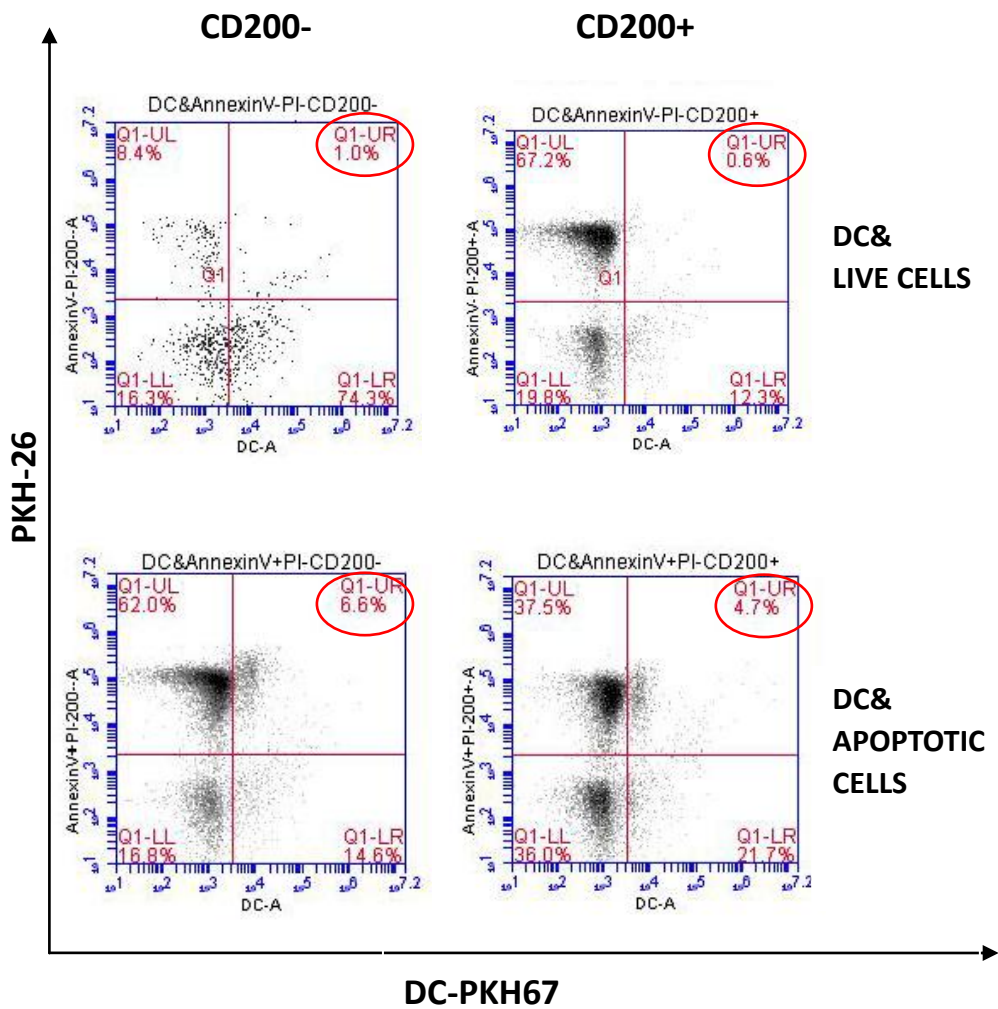

B

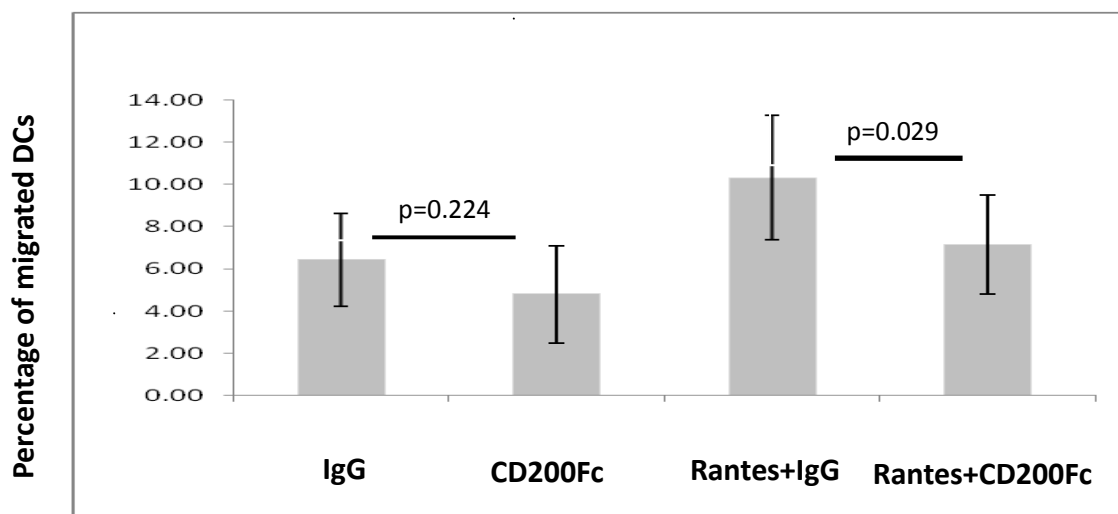

Supplement: MOESM16 [file 9694898]
